# Supplementary material
Source: PubMed Central journal article supplement (PMC6954322)
Supplement: NIHMS1541535-supplement-Table_S1.pdf [file NIHMS1541535-supplement-Table_S1.pdf]

**Table S1. Crystallographic data collection and refinement statistics**

| Data collection parameters     | GMPPNP bound KRAS4B <sup>G12R</sup> (1-169) |
|--------------------------------|---------------------------------------------|
| Wavelength                     | 0.97918                                     |
| Resolution range               | 49.36 - 1.5 (1.55 - 1.5)                    |
| Space group                    | C 1 2 1                                     |
| Unit cell                      | 67.79 83.29 86.04<br>90 110.1 90            |
| Total reflections              | 315524 (30381)                              |
| Unique reflections             | 70136 (6740)                                |
| Multiplicity                   | 4.5 (4.5)                                   |
| Completeness (%)               | 97.63 (94.33)                               |
| Mean I/sigma(I)                | 12.58 (1.16)                                |
| Wilson B-factor                | 26.11                                       |
| R-merge                        | 0.054 (0.87)                                |
| R-pim                          | 0.028 (0.57)                                |
| CC1/2                          | 0.998 (0.62)                                |
| CC*                            | 0.999 (0.87)                                |
| <b>Refinement parameters</b>   |                                             |
| Resolution range (Å)           | 50.00 - 1.5 (1.54 - 1.50)                   |
| Reflections used in refinement | 70087 (6740)                                |
| Reflections used for R-free    | 1854 (179)                                  |
| R-work                         | 0.202 (0.341)                               |
| R-free                         | 0.229 (0.369)                               |
| CC (work)                      | 0.961 (0.761)                               |
| CC (free)                      | 0.949 (0.679)                               |
| Number of non-hydrogen atoms   | 4250                                        |
| Macromolecules                 | 3913                                        |
| Ligands                        | 105                                         |
| Solvent                        | 232                                         |
| Protein residues               | 486                                         |
| RMS(bonds)                     | 0.007                                       |
| RMS(angles)                    | 1.2                                         |
| Ramachandran favored (%)       | 97.88                                       |
| Ramachandran allowed (%)       | 1.91                                        |
| Ramachandran outliers (%)      | 0.21                                        |
| Rotamer outliers (%)           | 0.70                                        |
| Clash score                    | 6.16                                        |
| Average B-factor               | 40.78                                       |
| Macromolecules                 | 40.93                                       |
| Ligands                        | 33.54                                       |
| Solvent                        | 41.49                                       |

Statistics for the highest-resolution shell are shown in parentheses.
